# Supplementary material
Source: publisher figshare collection journal article supplement (https://acs.figshare.com/ndownloader/files/19634675)
Supplement: Supplementary file 1 [file 19634675]

## Sheet: Feuil1
Table S7. Significantly enriched protein from MaxQuant label-free quantification analysis of ASDURF FLAG-based affinity purification. Related to Figure 1F.
-Log Student's T-test p-value ASDURF_FLAG	Difference ASDURF_FLAG	Protein IDs	Majority protein IDs	Protein names	Gene names	Peptides	Razor + unique peptides	Unique peptides	Sequence coverage [%]	Unique + razor sequence coverage [%]	Unique sequence coverage [%]	Mol. weight [kDa]	Q-value	Score	Intensity	MS/MS count	Student's T-test q-value ASDURF_FLAG	Log2 LFQ intensity ASDURF_1	Log2 LFQ intensity ASDURF_2	Log2 LFQ intensity ASDURF_3	Log2 LFQ intensity FLAG_1	Log2 LFQ intensity FLAG_2	Log2 LFQ intensity FLAG_3
7.94254	13.4895	L0R819;U3KQP1;U3KQ49;U3KQP6;U3KQE3	L0R819;U3KQP1		ASDURF	20	20	20	93.8	93.8	93.8	11.25	0	323.31	111490000000	788	0	33.8384	34.0102	34.0808	20.384	20.5208	20.556
4.56557	7.04081	Q5STK2;O15212;I7HJT1;A2AB88	Q5STK2;O15212	Prefoldin subunit 6	PFDN6	11	11	11	59.7	59.7	59.7	14.582	0	323.31	1334400000	93	0	27.0848	27.9199	27.9373	20.8944	20.3237	20.6014
3.58638	6.36662	Q99471;H3BPF6;H3BMQ1;F8VNW6;F8VQZ2	Q99471;H3BPF6	Prefoldin subunit 5	PFDN5	11	11	11	82.5	82.5	82.5	17.328	0	323.31	810180000	121	0	26.3248	27.1672	27.1523	20.6164	21.2236	19.7045
4.22203	6.01858	B1AQP2;Q9UHV9	B1AQP2;Q9UHV9	Prefoldin subunit 2	PFDN2	9	9	9	64.3	64.3	64.3	16.648	0	323.31	764190000	93	0	26.3071	27.1045	27.0447	20.9772	21.0672	20.356
4.05304	5.93163	A0A140VK67;Q96MX6;Q86YQ0;Q6QHF3;Q96LM8;Q8ND98;H7C389	A0A140VK67;Q96MX6;Q86YQ0;Q6QHF3;Q96LM8	WD repeat-containing protein 92	WDR92;HZGJ	15	15	15	55.7	55.7	55.7	39.74	0	185.86	669290000	106	0	26.6697	26.5491	26.7809	20.1111	21.3714	20.7223
3.99677	5.92465	Q9NQP4;E9PQY2;B2R548	Q9NQP4;E9PQY2;B2R548	Prefoldin subunit 4	PFDN4	8	8	8	41.8	41.8	41.8	15.314	0	323.31	540340000	93	0	25.9795	26.7433	26.2671	20.6479	19.7895	20.7786
2.68942	5.5192	O94763;Q6NX55;Q96C15;I3NI51;I3L280;I3L130;I3L104;I3L2V7;I3L467	O94763;Q6NX55;Q96C15	Unconventional prefoldin RPB5 interactor 1	URI1;C19orf2	16	16	16	48.6	48.6	48.6	59.832	0	240.29	481790000	75	0	26.218	26.1781	26.2819	22.2372	19.7475	20.1357
3.18335	5.42234	D3DWY7;P61758;Q6FH24;B4DWR3	D3DWY7;P61758;Q6FH24;B4DWR3	Prefoldin subunit 3	VBP1	13	13	13	45.9	45.9	45.9	26.535	0	323.31	872160000	157	0	26.3067	27.2596	27.0239	21.3632	20.6408	22.3193
4.51789	5.12408	A0A384NKN4;Q9NUG6	A0A384NKN4;Q9NUG6	p53 and DNA damage-regulated protein 1	PDRG1	5	5	5	45.9	45.9	45.9	15.511	0	242.99	350310000	49	0	25.5004	26.0329	25.5891	20.8424	20.2377	20.6701
4.31164	4.93064	Q9H6T3	Q9H6T3	RNA polymerase II-associated protein 3	RPAP3	25	25	25	48.7	48.7	48.7	75.718	0	229.86	390420000	100	0	26.0794	25.7016	25.916	20.5009	21.303	21.1012
3.62495	4.43388	B7Z4V2;V9HW84;A0A384P5G6;Q8N1C8;P38646;B7Z1V7;B7Z4T3;A0A3B3ITI4;A1XP52;D6RJI2;Q2F839;D6RA73;H0Y8S0	B7Z4V2;V9HW84;A0A384P5G6;Q8N1C8;P38646;B7Z1V7;B7Z4T3	Stress-70 protein, mitochondrial	HEL-S-124m;HSPA9	12	12	12	26.2	26.2	26.2	72.4	0	98.13	196000000	49	0	24.9611	24.8096	24.919	21.0891	20.4293	19.8696
2.70834	4.36415	P11021;V9HWB4;B4DEF7	P11021;V9HWB4	78 kDa glucose-regulated protein	HSPA5;HEL-S-89n	13	13	13	24.8	24.8	24.8	72.332	0	145.07	210950000	52	0	24.9021	24.9028	25.195	21.7549	20.437	19.7156
2.38572	4.13597	Q9UBK9;S4R2Z4	Q9UBK9;S4R2Z4	Protein UXT	UXT	5	5	5	29.9	29.9	29.9	18.246	0	47.699	152070000	24	0.0094913	24.4521	24.6004	24.621	21.7744	19.4443	20.0469
4.51808	3.81586	B5BUB1;A0A384MTR5;Q9Y265;E7ETR0;H7C4G5;B3KRS7;J3QLR1;H7C4I3	B5BUB1;A0A384MTR5;Q9Y265;E7ETR0;H7C4G5;B3KRS7	RuvB-like 1	RUVBL1	11	11	11	36.8	36.8	36.8	50.215	0	144.16	153570000	62	0	24.5218	24.4786	24.6361	21.0252	20.4181	20.7457
3.64741	3.79616	A0A0A0MQR7;E5KT65;P19388;A0A087WVZ9;K7EQN2;K7EJ87	A0A0A0MQR7;E5KT65;P19388;A0A087WVZ9	DNA-directed RNA polymerases I, II, and III subunit RPABC1	POLR2E	6	6	3	33.8	33.8	18.6	23.566	0	75.96	79708000	23	0	23.5742	23.7681	23.4953	20.1724	19.2439	20.0328
3.53375	3.18132	P62979;A0A248RGE3;F5H747;F5GXK7;J3QKN0;Q5U5U6;Q5PY61;Q9UFQ0;Q96C32;Q96MH4;L8B4I8;Q59EM9;Q96H31;L8B4R0;A8K674;L8B4J3;L8B4M0;L8B4Z6;Q66K58;L8B196;B2RDW1;F5H6Q2;F5H265;Q3MIH3;Q5RKT7;F5H2Z3;J3QTR3;F5GYU3;Q5UGI3;B4DV12;F5H388;J3QS39;P0CG48;P62987;P0CG47;M0R1M6;A0A2R8Y422;Q49A90;M0R1V7;Q8WYN9;M0R2S1;F5GZ39;J3QSA3	P62979;A0A248RGE3;F5H747;F5GXK7;J3QKN0;Q5U5U6;Q5PY61;Q9UFQ0;Q96C32;Q96MH4;L8B4I8;Q59EM9;Q96H31;L8B4R0;A8K674;L8B4J3;L8B4M0;L8B4Z6;Q66K58;L8B196;B2RDW1;F5H6Q2;F5H265;Q3MIH3;Q5RKT7;F5H2Z3;J3QTR3;F5GYU3;Q5UGI3;B4DV12;F5H388;J3QS39;P0CG48;P62987;P0CG47;M0R1M6;A0A2R8Y422;Q49A90;M0R1V7;Q8WYN9;M0R2S1	Ubiquitin-40S ribosomal protein S27a;Ubiquitin;40S ribosomal protein S27a;Polyubiquitin-C;Ubiquitin;Ubiquitin-60S ribosomal protein L40;Ubiquitin;60S ribosomal protein L40;Polyubiquitin-B;Ubiquitin	RPS27A;UBC;UBB;DKFZp434K0435;UbC;HEL112;UBA52	3	3	3	21.8	21.8	21.8	17.965	0	25.265	74983000	12	0	23.7652	23.3952	23.249	20.5337	19.8478	20.484
3.16935	3.17678	P11142;V9HW22;E9PKE3;Q53GZ6;B3KTV0;Q96IS6;Q53HF2;E9PNE6;E9PN89;B4E1Q1;A8K7Q2;B4DTX2;E9PLF4;E9PK54;E9PQK7;E9PQQ4;A0A024R6B5;A0A384MDT7;P54652;E9PPY6;E9PI65;E9PN25;Q96BE0;B3KUS2;E9PS65;Q96H53;E9PM13;Q9NWW3;A4D111;Q9NZ87	P11142;V9HW22;E9PKE3;Q53GZ6;B3KTV0;Q96IS6;Q53HF2;E9PNE6;E9PN89;B4E1Q1	Heat shock cognate 71 kDa protein	HSPA8;HEL-S-72p	21	18	17	38.4	35	33.6	70.897	0	323.31	1080700000	203	0	27.2377	27.198	27.3295	23.7868	23.7091	24.7389
2.19332	3.14231	A0A024QZE9;Q9NWS0;M0QXD5;M0QYA2;M0R0J2;M0R2P8;M0R3A8;M0QYF4;M0R3A4	A0A024QZE9;Q9NWS0;M0QXD5;M0QYA2;M0R0J2;M0R2P8;M0R3A8;M0QYF4;M0R3A4	PIH1 domain-containing protein 1	FLJ20643;PIH1D1	4	4	4	22.1	22.1	22.1	32.431	0	280.34	76499000	14	0.0182208	23.5876	23.5104	23.6163	21.0959	19.2304	20.961
3.46358	3.00321	A0A0G2JIW1;P0DMV9;P0DMV8;A8K5I0;A0A1U9X7W4;B4DNT8;Q59EJ3;B4DWK5;B4DFN9;B4DI39;B4E1S9;B4E388;B4DVU9;B3KTT5;V9GZ37;B4DNX1;B4E1T6;B4DI54;Q53FA3;A0A1U9X7X9;P34931;A0A1U9X7W7;A0A1U9X7X4;B2RCQ9;B4DXY3;Q9UQC1;B4DNV4	A0A0G2JIW1;P0DMV9;P0DMV8;A8K5I0;A0A1U9X7W4;B4DNT8;Q59EJ3;B4DWK5;B4DFN9;B4DI39;B4E1S9;B4E388;B4DVU9;B3KTT5;V9GZ37;B4DNX1;B4E1T6	Heat shock 70 kDa protein 1B;Heat shock 70 kDa protein 1A	HSPA1B;HSPA1A;HEL-S-103	33	33	27	60.1	60.1	49.8	70.108	0	323.31	3444300000	377	0	28.7572	28.9777	29.0191	25.4206	26.0773	26.2465
1.81384	2.81805	A0A090N8Z0;A0A090N8G7;Q8TA86;A0A090N8Y9;C9J6V2	A0A090N8Z0;A0A090N8G7;Q8TA86;A0A090N8Y9	Retinitis pigmentosa 9 protein	RP9;LOC402478;LOC392652	5	5	5	29.9	29.9	29.9	26.106	0	34.367	100030000	26	0.0325037	23.2717	23.8622	23.881	20.0183	20.3756	22.1669
1.92897	2.7597	Q9Y230;B3KNL2;M0R0Y3;B4DW30;X6R2L4;M0QXZ7;M0R0Z0;M0QXI6	Q9Y230;B3KNL2;M0R0Y3	RuvB-like 2	RUVBL2	10	10	10	26.6	26.6	26.6	51.156	0	69.878	93737000	38	0.0337538	23.224	23.7552	24.0086	20.1994	22.0632	20.4461
2.13542	1.19147	Q8N5F7;Q5M9Q1	Q8N5F7;Q5M9Q1	NF-kappa-B-activating protein;NKAP-like protein	NKAP;NKAPL	4	4	4	14.9	14.9	14.9	47.138	0	65.93	115250000	33	0.0313429	23.8306	23.9802	23.4936	22.3328	22.9465	22.4508
